# Supplementary material
Source: HighWire-hosted journal article supplement (http://thorax.bmjjournals.com/highwire/filestream/174159/field_highwire_adjunct_files/0/644345webonlyapp1.pdf)

# Supplementary Figure 1

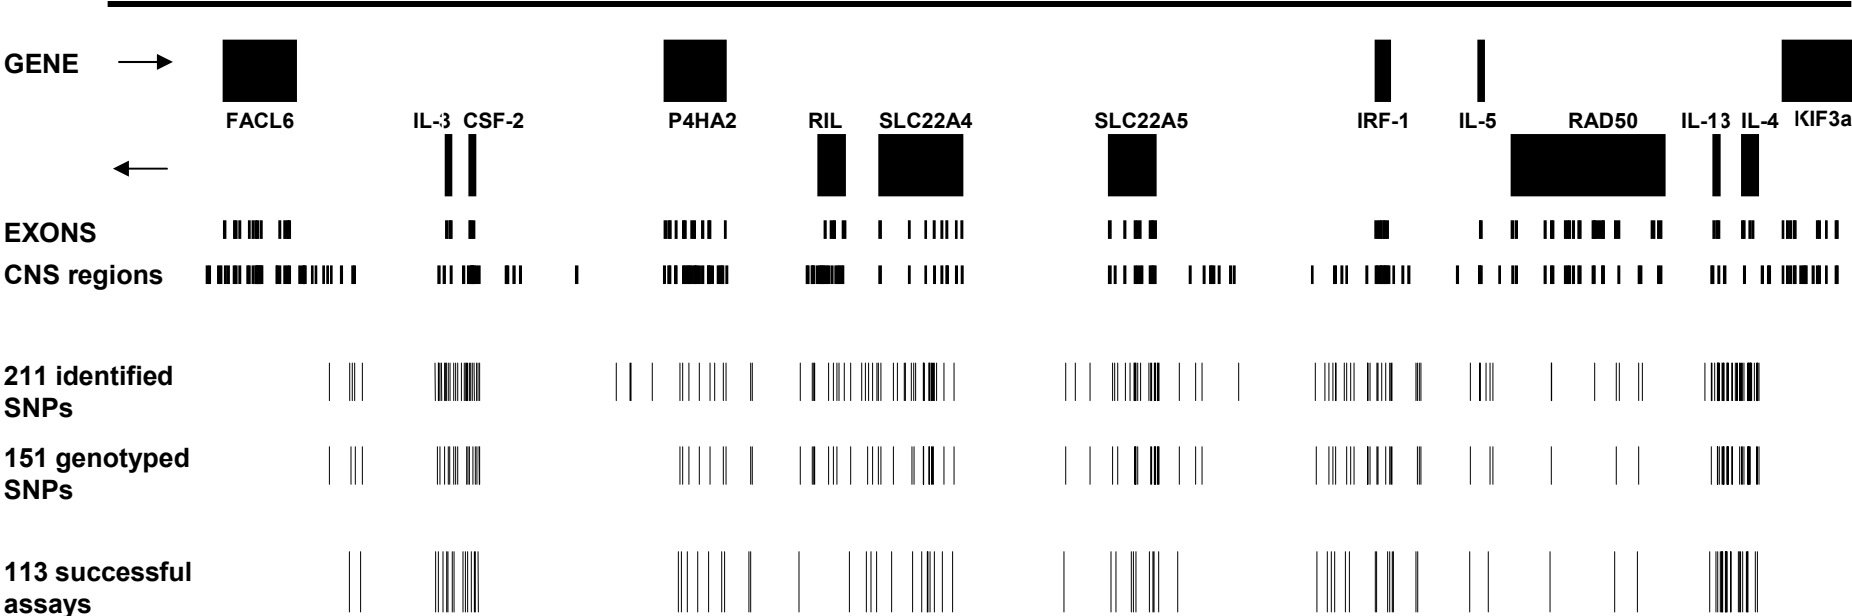

Supplement: 644345webonlyapp1.pdf [file 644345webonlyapp1.pdf]
